# Supplementary material for: Crystal Structure of a Highly Thermostable α-Carbonic Anhydrase from Persephonella marina EX-H1
Source: PubMed Central journal article supplement — Mol Cells. 2019 Jun 3;42(6):460–9. doi: 10.14348/molcells.2019.0029 (PMC6602146; doi:10.14348/molcells.2019.0029), 2019-06-03
Supplement: MOLCE-42-460_suppl.pdf [file MOLCE-42-460_suppl.pdf]

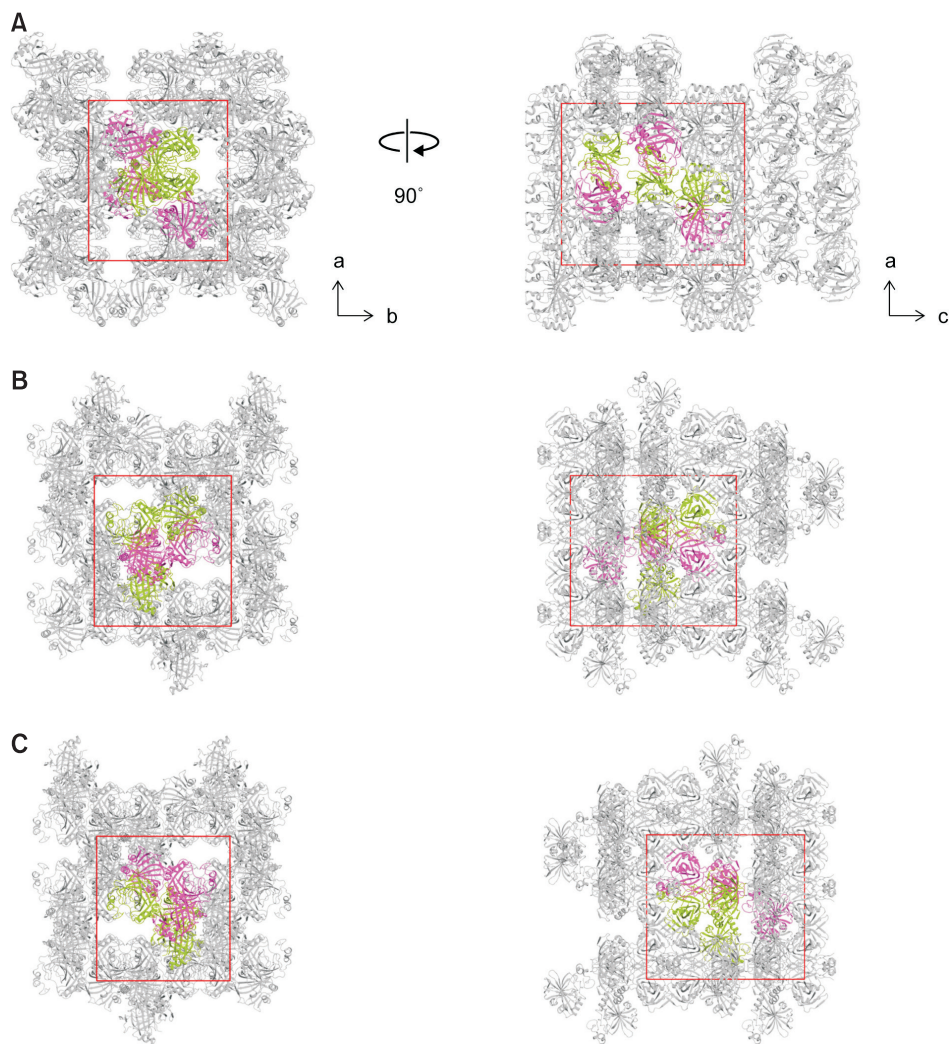

**Supplementary Fig. S1. Crystal packing of *pmCA* dimers in the asymmetric unit with and without acetazolamide.** (A) Bicarbonate-bound *pmCA* (Crystal form 1), water-bound *pmCA* (Crystal form 2), and acetazolamide-bound *pmCA* (Crystal form 3). Crystal packing is shown along crystallographic axes *c* (left) and *b* (right). Unit cells are shown as red boxes. Monomers of the *pmCA* dimer are colored magenta and green, respectively.

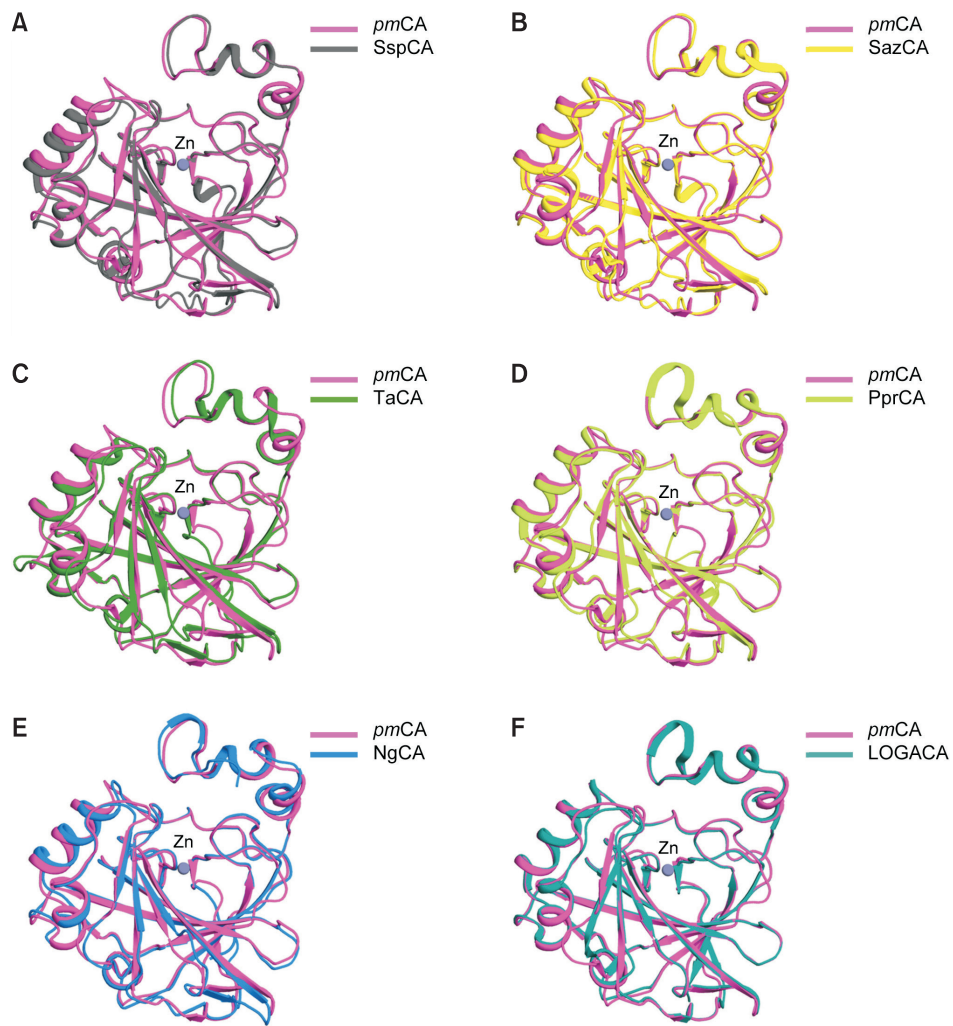

**Supplementary Fig. S2. Structural comparison of *pmCA* with other bacterial  $\alpha$ -CAs.** Superposition of the *pmCA* monomer with *SspCA* (A, PDB ID 4G7A), *SazCA* (B, PDB ID 4X5S), *TaCA* (C, PDB ID 4COQ), *PprCA* (D, PDB ID 5HPJ), *NgCA* (E, PDB ID 1KOP), and *LOGACA* (F, PDB ID 6EKI).

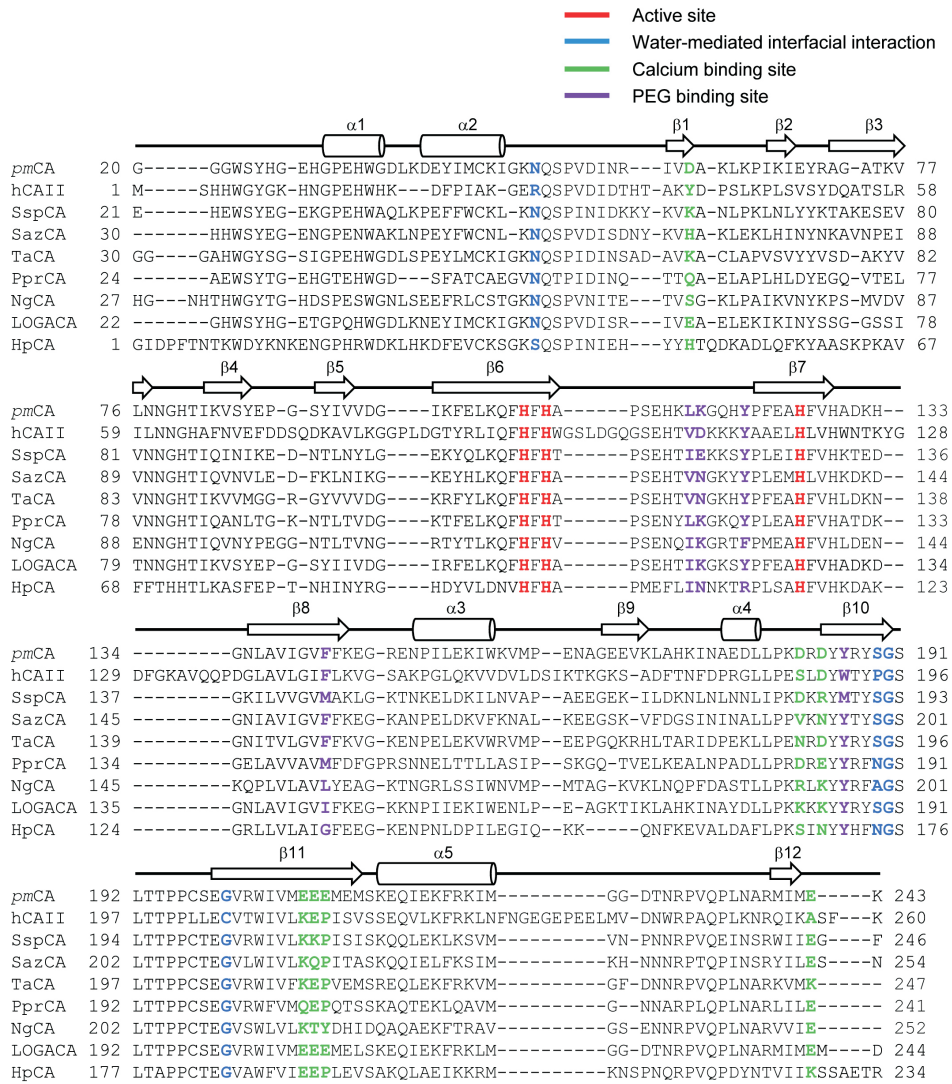

**Supplementary Fig. S3. Structure-based sequence alignment of *pmCA* with other  $\alpha$ -CAs.** *pmCA*, *hCAII*, *SspCA*, *SazCA*, *TaCa*, *PprCA*, *NgCA*, *LOGACA*, and *HpCA* amino acid sequences are aligned based on their structures. Conserved catalytic histidine residues, residues involved in water-mediated interactions between monomers, and residues involved in coordination of calcium ions and PEG molecules are colored red, blue, green, and purple, respectively. The positions of  $\alpha$ -helices and  $\beta$ -strands are indicated by cylinders and arrows above the sequences, and are numbered accordingly.

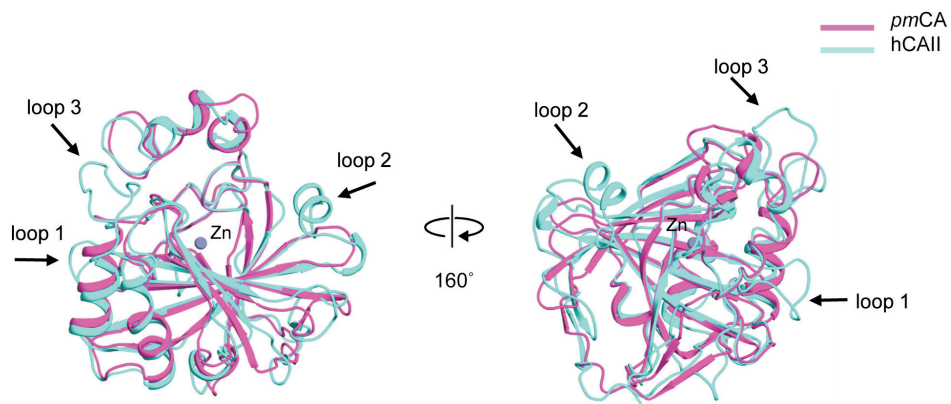

**Supplementary Fig. S4. Structural differences between *pmCA* and *hCAII*.** The *pmCA* structure is superimposed with that of *hCAII* (PDB ID 1CA2). Substantial structural differences include deletion of surface loops in *pmCA* (indicated by arrows). Zinc ions are shown as gray spheres.

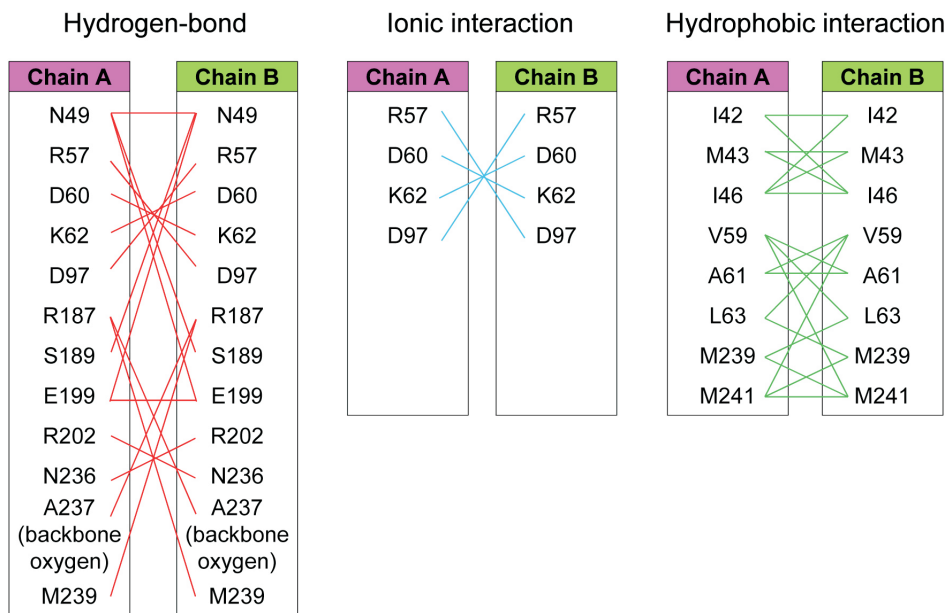

**Supplementary Fig. S5. Schematic diagram of interfacial interactions in the *pmCA* dimer.** Interacting residues in the *pmCA* dimer interface are indicated. Hydrogen bonds are represented by red lines. Ionic and hydrophobic interactions are shown as cyan and green lines, respectively.

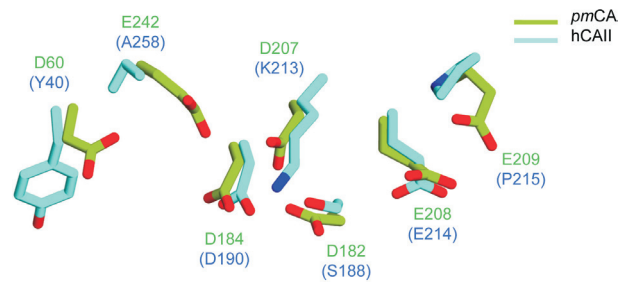

**Supplementary Fig. S6.** Comparison of the structures of the calcium binding site of *pmCA* and *hCAII*. The side chains of residues that differ significantly are shown. Amino acids in parentheses represent the corresponding residues in *hCAII* (PDB ID 1CA2).

Supplementary Table S1. Data collection and refinement statistics

|                                       | Form 1<br>(PDB ID 6IM0) | Form 2<br>(PDB ID 6IM1)          | Form 3<br>(PDB ID 6IM3)          |
|---------------------------------------|-------------------------|----------------------------------|----------------------------------|
| <b>Data collection</b>                |                         |                                  |                                  |
| Space group                           | C2                      | P2 <sub>1</sub> 2 <sub>1</sub> 2 | P2 <sub>1</sub> 2 <sub>1</sub> 2 |
| Cell dimensions                       |                         |                                  |                                  |
| a, b, c (Å)                           | 124.8, 109.0, 123.1     | 118.9, 120.0, 124.0              | 119.0, 120.8, 123.9              |
| $\alpha$ , $\beta$ , $\gamma$ (°)     | 90.0, 90.0, 90.0        | 90.0, 90.0, 90.0                 | 90.0, 90.0, 90.0                 |
| Resolution (Å)                        | 50.0-2.6 (2.69-2.60)    | 50.0-2.0 (2.07-2.00)             | 50.0-2.0 (2.07-2.00)             |
| R <sub>pim</sub>                      | 0.08 (0.31)             | 0.02 (0.33)                      | 0.03 (0.44)                      |
| I/ $\sigma$ I                         | 9.8 (2.0)               | 48.1 (3.7)                       | 42.4 (2.1)                       |
| CC1/2                                 | 0.9 (0.7)               | 0.9 (0.8)                        | 0.9 (0.7)                        |
| Completeness (%)                      | 97.9 (98.7)             | 99.7 (99.8)                      | 99.2 (98.8)                      |
| Redundancy                            | 3.4 (3.3)               | 9.4 (9.5)                        | 9.2 (9.5)                        |
| <b>Refinement</b>                     |                         |                                  |                                  |
| Resolution (Å)                        | 50.0-2.6                | 50.0-2.0                         | 50.0-2.0                         |
| No. reflections<br>(work/test)        | 47255/2478              | 113414/5670                      | 113905/5968                      |
| R <sub>work</sub> / R <sub>free</sub> | 18.9/22.7               | 20.3/23.5                        | 20.9/23.9                        |
| No. atoms                             |                         |                                  |                                  |
| Protein                               | 10824                   | 10824                            | 10824                            |
| Zinc                                  | 6                       | 6                                | 6                                |
| Bicarbonate                           | 24                      | -                                | -                                |
| Acetazolamide                         | -                       | -                                | 78                               |
| PEG400                                | 65                      | 52                               | 26                               |
| Calcium                               | 15                      | 15                               | 16                               |
| Water                                 | 249                     | 500                              | 472                              |
| B factors (Å <sup>2</sup> )           |                         |                                  |                                  |
| Protein                               | 43.7                    | 48.3                             | 55.3                             |
| Zinc                                  | 33.3                    | 43.0                             | 44.8                             |
| Bicarbonate                           | 46.5                    | -                                | -                                |
| Acetazolamide                         | -                       | -                                | 66.3                             |
| PEG                                   | 65.0                    | 71.2                             | 77.3                             |
| Calcium                               | 50.7                    | 61.5                             | 68.3                             |
| Water                                 | 30.2                    | 43.9                             | 49.6                             |
| R.m.s. deviations                     |                         |                                  |                                  |
| Bond lengths (Å)                      | 0.013                   | 0.021                            | 0.019                            |
| Bond angles (°)                       | 1.814                   | 1.089                            | 2.167                            |
| Ramachandran plot (%)                 |                         |                                  |                                  |
| Most favored                          | 89.5                    | 91.1                             | 92.0                             |
| Allowed                               | 10.0                    | 8.4                              | 7.5                              |
| Generously allowed                    | 0.5                     | 0.5                              | 0.5                              |
| Disallowed                            | 0                       | 0                                | 0                                |

\*Numbers in parentheses were calculated with data in the highest resolution shell.
